# Supplementary material
Source: PubMed Central journal article supplement (PMC9724922)
Supplement: EIJ-D-21-00294_Protty_SD.pdf [file EIJ-D-21-00294_Protty_SD.pdf]

## **Supplementary data**

### **Supplementary Appendix 1. Study endpoint definitions**

MACCE - defined as death, in-hospital CVA or MI.

In-hospital bleeding - defined as either gastrointestinal bleed, intracerebral bleed, retroperitoneal haematoma, blood or platelet transfusion, access-site haemorrhage, or an arterial access-site complication requiring surgery.

Acute coronary procedural complication - defined as no flow, perforation, dissection and major side branch loss.

Access-site complication - defined as either a false aneurysm, haemorrhage (without haematoma), haemorrhage with delayed discharge, retroperitoneal haematoma, arterial dissection, or any access-site complication requiring surgical repair.

### **Supplementary Appendix 2. Statistical methodology**

To adjust for baseline imbalances in order to balance for important covariates that might bias estimates for causal inferences, propensity scores (PS) were calculated using fitted probabilities generated from a logistic regression model by access site which included all covariates described below. These scores were then used to calculate IPTW weights, as previously described, which were utilised to model adjusted outcomes [2]. Prior to performing this, multiple imputations were carried out using the mice package to reduce the potential bias from missing data (**Supplementary Table 1**), assuming missingness at random mechanisms, by using chained equations to impute the data for all variables with missing information generating five data sets to be used in the analyses with satisfactory density plots demonstrating a similar distribution between the imputed and observed data sets (**Supplementary Figure 2**). Covariates included in the adjustment were age, gender, clinical presentation, cardiogenic shock, previous MI, previous CABG, previous PCI, diabetes, baseline disease severity, LV function, smoking status, history of hypertension, stroke, renal failure, valvular heart disease, peripheral vascular disease, left main stem PCI (LMS-PCI), chronic total occlusion PCI (CTO-PCI) attempted, restenosis indication, rotational or laser atherectomy use, use of intracoronary imaging, use of cutting/scoring balloons, use of microcatheter support and mechanical LV support.

**Supplementary Table 1. Percent missing values for each variable in the analysed data sets.**

| <b>Variable</b>                 | <b>Brachial vs femoral (%)</b> | <b>Brachial vs radial (%)</b> |
|---------------------------------|--------------------------------|-------------------------------|
| Age                             | 0.1                            | 0.0                           |
| Number of disease lesions       | 11.7                           | 6.0                           |
| Number of vessels attempted     | 0.9                            | 1.3                           |
| Number of lesions attempted     | 1.3                            | 1.0                           |
| Number of CTO attempted         | 11.0                           | 6.2                           |
| Length of stay                  | 0.0                            | 0.0                           |
| Female gender                   | 0.2                            | 0.2                           |
| Clinical syndrome (ACS)         | 0.0                            | 0.0                           |
| Cardiogenic shock pre procedure | 1.7                            | 0.9                           |
| Previous MI                     | 11.3                           | 3.7                           |
| Previous CABG                   | 4.2                            | 2.0                           |
| Previous PCI                    | 4.9                            | 1.9                           |
| Diabetes                        | 5.7                            | 2.4                           |
| Ejection fraction <30%          | 51.6                           | 47.8                          |
| Smoking history                 | 14.1                           | 8.1                           |
| Hypertension                    | 2.6                            | 1.9                           |
| Stroke                          | 2.6                            | 1.9                           |
| PVD                             | 2.6                            | 1.9                           |
| Valve disease                   | 2.6                            | 1.9                           |
| Renal disease                   | 8.0                            | 3.7                           |
| Ventilated pre procedure        | 17.4                           | 7.7                           |
| LMS                             | 4.0                            | 4.7                           |
| Rota                            | 7.0                            | 4.9                           |
| Laser                           | 7.0                            | 4.9                           |
| Cutting                         | 7.0                            | 4.9                           |
| Microcatheter                   | 7.0                            | 4.9                           |
| IABP                            | 4.9                            | 2.8                           |
| Periprocedural MI               | 0.0                            | 0.0                           |
| Transfusion                     | 0.0                            | 0.0                           |
| Periprocedural stroke           | 0.0                            | 0.0                           |
| AKI                             | 0.0                            | 0.0                           |
| In-hospital death               | 0.0                            | 0.0                           |
| MACCE                           | 0.0                            | 0.0                           |
| Major bleeding                  | 0.0                            | 0.0                           |
| Slow flow                       | 0.0                            | 0.0                           |
| Side branch loss                | 0.0                            | 0.0                           |
| Dissection                      | 0.0                            | 0.0                           |
| Perforation                     | 0.0                            | 0.0                           |
| Heart block                     | 0.0                            | 0.0                           |
| DCCV                            | 0.0                            | 0.0                           |
| Shock induction                 | 0.0                            | 0.0                           |
| Arterial complications          | 0.0                            | 0.0                           |
| Arterial haemorrhage            | 0.0                            | 0.0                           |
| Access site                     | 0.0                            | 0.0                           |

**Supplementary Table 2. Baseline patient characteristics by access site for PCI in the United Kingdom 2006-2017.**

| <b>Variable</b>                    | <b>All<br/>(n=861,773)</b> | <b>Brachial<br/>(n=1,133)</b> | <b>Femoral<br/>(n=329,591)</b> | <b>p-value*</b> | <b>Radial<br/>(n=531,049)</b> | <b>p-value†</b> |
|------------------------------------|----------------------------|-------------------------------|--------------------------------|-----------------|-------------------------------|-----------------|
| Age (years), ±SD                   | 65.2±11.9                  | 66.6±11.6                     | 65.7±11.9                      | 0.009           | 64.9±11.8                     | <0.001          |
| Female sex, n (%)                  | 222,796 (25.9)             | 377 (33.4)                    | 92,764 (28.2)                  | 0.001           | 129,655 (24.5)                | <0.001          |
| History of smoking, n (%)          | 481,911 (62.4)             | 669 (66.4)                    | 176,142 (62.2)                 | 0.007           | 305,100 (62.5)                | 0.012           |
| Diabetes mellitus, n (%)           | 190,879 (23.3)             | 353 (32.2)                    | 82,705 (26.4)                  | <0.001          | 104,087 (20.1)                | <0.001          |
| Previous MI, n (%)                 | 222,831(27.7)              | 437 (40.9)                    | 93,490 (32.0)                  | 0.001           | 128,904 (25.2)                | <0.001          |
| Hypertension, n (%)                | 454,553 (53.9)             | 693 (63.0)                    | 173,763 (54.1)                 | <0.001          | 280,097 (53.8)                | <0.001          |
| Peripheral vascular disease, n (%) | 37,275 (4.4)               | 277 (25.2)                    | 14,732 (4.6)                   | <0.001          | 22,266 (4.3)                  | <0.001          |
| Previous stroke, n (%)             | 33,113 (3.9)               | 98 (8.9)                      | 12,330 (3.8)                   | <0.001          | 20,685 (4.0)                  | <0.001          |
| Chronic renal disease, n (%)       | 22,012 (2.7)               | 78 (7.3)                      | 11,733 (3.9)                   | <0.001          | 10,201 (2.0)                  | <0.001          |
| Valvular heart disease, n (%)      | 12,615 (1.5)               | 31 (2.8)                      | 4,627 (1.4)                    | <0.001          | 7,957 (1.5)                   | 0.001           |
| Previous CABG, n (%)               | 69,036 (8.2)               | 163 (14.8)                    | 43,292 (13.7)                  | 0.308           | 25,581 (4.9)                  | <0.001          |
| Previous PCI, n (%)                | 203,019 (24.3)             | 353 (32.2)                    | 82,705 (26.4)                  | <0.001          | 119,961 (23.0)                | <0.001          |
| Cardiogenic shock pre, n (%)       | 17,981 (2.1)               | 41 (3.7)                      | 10,634 (3.3)                   | 0.509           | 7,306 (1.4)                   | <0.001          |
| ACS presentation, n (%)            | 526,638 (61.1)             | 672 (59.3)                    | 186,046 (56.4)                 | 0.052           | 339,920 (64.0)                | 0.001           |
| Ejection fraction <30%, n (%)      | 25,282 (5.8)               | 55 (8.9)                      | 11,498 (7.2)                   | 0.120           | 13,729 (5.0)                  | <0.001          |
| Ventilated pre procedure, n (%)    | 12,359 (1.9)               | 28 (2.8)                      | 7,231 (2.7)                    | 0.923           | 5,100 (1.0)                   | <0.001          |

\* p-value brachial vs femoral. † p-value brachial vs radial.

**Supplementary Table 3. Procedural variables by access site for PCI in the United Kingdom 2006-2017.**

| <b>Variable</b>                | <b>All<br/>(n=861,773)</b> | <b>Brachial<br/>(n=1,133)</b> | <b>Femoral<br/>(n=329,591)</b> | <b>p-value*</b> | <b>Radial<br/>(n=531,049)</b> | <b>p-value†</b> |
|--------------------------------|----------------------------|-------------------------------|--------------------------------|-----------------|-------------------------------|-----------------|
| Number of diseased vessels ±SD | 1.36±0.8                   | 1.51±0.9                      | 1.41±0.8                       | 0.001           | 1.32±0.7                      | <0.001          |
| No. of vessels attempted ±SD   | 1.19±0.7                   | 1.26±0.6                      | 1.20±0.6                       | 0.019           | 1.18±0.6                      | 0.001           |
| No. of lesions attempted ±SD   | 1.35±0.6                   | 1.42±0.6                      | 1.39±0.6                       | 0.772           | 1.31±0.6                      | <0.001          |
| No. of CTO PCI attempted, ±SD  | 0.07±0.3                   | 0.10±0.3                      | 0.09±0.3                       | 0.906           | 0.06±0.3                      | <0.001          |
| Rotational atherectomy, n (%)  | 15,250 (1.9)               | 51 (4.8)                      | 7,225 (2.4)                    | <0.001          | 7,974 (1.6)                   | <0.001          |
| Circulatory support, n (%)     | 9,700 (1.5)                | 14 (1.3)                      | 6,729 (2.2)                    | 0.040           | 2,957 (0.7)                   | 0.018           |
| Pressure wire, n (%)           | 88,569 (10.7)              | 94 (8.8)                      | 20,793 (6.6)                   | 0.005           | 67,682 (13.3)                 | <0.001          |
| Intracoronary imaging, n (%)   | 54,819 (6.6)               | 78 (7.3)                      | 15,488 (4.9)                   | 0.001           | 39,253 (7.7)                  | 0.668           |
| Target vessels, n (%)          |                            |                               |                                |                 |                               |                 |
| Left main                      | 34,027 (4.3)               | 96 (8.8)                      | 15,525 (4.9)                   | <0.001          | 18,406 (3.6)                  | <0.001          |
| Left anterior descending       | 398,693 (48.1)             | 495 (45.4)                    | 145,063 (45.8)                 | 0.821           | 253,135 (50.0)                | 0.003           |
| Circumflex                     | 202,846 (24.6)             | 291 (26.7)                    | 76,985 (24.3)                  | 0.071           | 125,570 (24.8)                | 0.157           |
| Right                          | 295,309 (35.9)             | 392 (36.0)                    | 113,790 (36.0)                 | 1.000           | 181,127 (35.8)                | 0.918           |
| Atherectomy balloon, n (%)     | 25,058 (3.1)               | 68 (6.4)                      | 9,936 (3.2)                    | <0.001          | 15,054 (3.0)                  | <0.001          |
| Microcatheter, n (%)           | 12,348 (1.5)               | 28 (2.6)                      | 4,404 (1.4)                    | 0.001           | 7,916 (1.6)                   | 0.013           |
| Glycoprotein inhibitor, n (%)  | 163,895 (20.3)             | 181 (17.3)                    | 68,251 (22.2)                  | <0.001          | 95,463 (19.0)                 | 0.175           |
| Longest stent (mm) ±SD         | 25.8±14.5                  | 25.6±14.2                     | 24.1±13.7                      | 0.005           | 27.2±15.2                     | <0.001          |
| No. of stents used ±SD         | 1.46±1.0                   | 1.50±1.0                      | 1.48±1.0                       | 0.679           | 1.43±1.0                      | 0.239           |

\* p-value brachial vs femoral. † p-value brachial vs radial.

**Supplementary Table 4. Baseline patient characteristics by access site for PCI in the United Kingdom 2006-2017 for default radial operators.**

| <b>Variable</b>                        | <b>All<br/>(n=43,605)</b> | <b>Femoral<br/>(n=43,050)</b> | <b>Brachial<br/>(n=555)</b> | <b><i>p</i>-<br/>value</b> |
|----------------------------------------|---------------------------|-------------------------------|-----------------------------|----------------------------|
| Age (years), $\pm$ SD                  | 67.3 $\pm$ 12.1           | 67.3 $\pm$ 12.1               | 66.2 $\pm$ 11.4             | 0.02                       |
| Number of disease lesions, $\pm$ SD    | 1.6 $\pm$ 0.9             | 1.6 $\pm$ 0.9                 | 1.5 $\pm$ 0.9               | 0.15                       |
| Female gender, n (%)                   | 15,052 (34.6)             | 14,863 (34.6)                 | 189 (34.2)                  | 0.87                       |
| Clinical syndrome (ACS), n (%)         | 27,335 (62.7)             | 26,978 (62.7)                 | 357 (64.3)                  | 0.46                       |
| Cardiogenic shock pre procedure, n (%) | 3,296 (7.6)               | 3,275 (7.7)                   | 21 (3.8)                    | 0.00                       |
| Previous MI, n (%)                     | 17,202 (41)               | 16,955 (41)                   | 247 (45.7)                  | 0.03                       |
| Previous CABG, n (%)                   | 9,598 (22.3)              | 9,512 (22.4)                  | 86 (15.8)                   | 0.00                       |
| Previous PCI, n (%)                    | 14,693 (34.4)             | 14,508 (34.4)                 | 185 (34.1)                  | 0.91                       |
| Diabetes, n (%)                        | 11,056 (26.1)             | 10,900 (26.1)                 | 156 (28.8)                  | 0.17                       |
| Ejection fraction <30%, n (%)          | 2,701 (10.8)              | 2,673 (10.8)                  | 28 (9.2)                    | 0.43                       |
| Smoking history, n (%)                 | 23,907 (61.3)             | 23,555 (61.2)                 | 352 (69.3)                  | 0.00                       |
| Hypertension, n (%)                    | 25,418 (59.7)             | 25,074 (59.7)                 | 344 (63.2)                  | 0.10                       |
| Stroke, n (%)                          | 2,672 (6.3)               | 2,612 (6.2)                   | 60 (11)                     | 0.00                       |
| PVD, n (%)                             | 3,384 (8)                 | 3,252 (7.7)                   | 132 (24.3)                  | 0.00                       |
| Valve disease, n (%)                   | 1,119 (2.6)               | 1,101 (2.6)                   | 18 (3.3)                    | 0.38                       |
| Renal disease, n (%)                   | 2,640 (6.4)               | 2,597 (6.3)                   | 43 (8.1)                    | 0.11                       |
| Ventilated pre procedure, n (%)        | 2,236 (5.5)               | 2,220 (5.6)                   | 16 (3.1)                    | 0.02                       |
| Q-wave on ECG, n (%)                   | 6,326 (15.8)              | 6,260 (15.8)                  | 66 (13)                     | 0.10                       |

**Supplementary Table 5. Procedural characteristics by access site for PCI in the United Kingdom 2006-2017 for default radial operators.**

| <b>Variable</b>                                     | <b>All<br/>(n=43,605)</b> | <b>Femoral<br/>(n=43,050)</b> | <b>Brachial<br/>(n=555)</b> | <b><i>p</i>-value</b> |
|-----------------------------------------------------|---------------------------|-------------------------------|-----------------------------|-----------------------|
| No. of vessels attempted, $\pm$ SD                  | 1.3 $\pm$ 0.6             | 1.3 $\pm$ 0.6                 | 1.2 $\pm$ 0.6               | 0.81                  |
| No. of lesions attempted, $\pm$ SD                  | 1.4 $\pm$ 0.8             | 1.4 $\pm$ 0.8                 | 1.4 $\pm$ 0.8               | 0.33                  |
| No. of chronic total occlusions attempted, $\pm$ SD | 0.1 $\pm$ 0.3             | 0.1 $\pm$ 0.3                 | 0.1 $\pm$ 0.3               | 0.20                  |
| LMS disease pre PCI, n (%)                          | 3,894 (9.3)               | 3,843 (9.3)                   | 51 (9.6)                    | 0.87                  |
| Rotational atherectomy, n (%)                       | 1,932 (4.6)               | 1,903 (4.6)                   | 29 (5.3)                    | 0.50                  |
| Laser, n (%)                                        | 217 (0.5)                 | 217 (0.5)                     | 0 (0)                       | -                     |
| Cutting balloon use, n (%)                          | 1,287 (3.1)               | 1,257 (3)                     | 30 (5.5)                    | 0.00                  |
| Microcatheter use, n (%)                            | 1,590 (3.8)               | 1,570 (3.8)                   | 20 (3.7)                    | 0.99                  |
| Intra-aortic balloon pump use, n (%)                | 1,488 (3.5)               | 1,480 (3.5)                   | 8 (1.5)                     | 0.02                  |

**Supplementary Table 6. Crude unadjusted outcomes by access site for PCI in the United Kingdom 2006-2017.**

| <b>Outcome</b>                    | <b>All<br/>(n=861,773)</b> | <b>Brachial<br/>(n=1,133)</b> | <b>Femoral<br/>(n=329,591)</b> | <b>p-value*</b> | <b>Radial<br/>(n=531,049)</b> | <b>p-value†</b> |
|-----------------------------------|----------------------------|-------------------------------|--------------------------------|-----------------|-------------------------------|-----------------|
| Procedural success, n (%)         | 716,877 (92.0)             | 943 (91.0)                    | 265,452 (91.2)                 | 0.885           | 450,482 (92.5)                | 0.0283          |
| Number of successful vessels, ±SD | 1.05±0.49                  | 1.09±0.57                     | 1.05±0.50                      | 0.002           | 1.06±0.48                     | 0.009           |
| Number of successful lesions, ±SD | 1.27±0.77                  | 1.33±0.85                     | 1.31±0.80                      | 0.298           | 1.25±0.75                     | <0.001          |
| Major side branch loss, n (%)     | 5,042 (0.6)                | 9 (0.8)                       | 1,753 (0.6)                    | 0.501           | 3,280 (0.6)                   | 0.500           |
| Slow flow, n (%)                  | 7,698 (0.9)                | 9 (0.8)                       | 2,948 (1.0)                    | 0.601           | 4,741 (0.9)                   | 0.844           |
| Coronary dissection, n (%)        | 12,455 (1.5)               | 11 (1.0)                      | 4,777 (1.6)                    | 0.143           | 7,657 (1.5)                   | 0.215           |
| Coronary perforation, n (%)       | 2,417 (0.3)                | 2 (0.2)                       | 955 (0.3)                      | 0.773           | 1,460 (0.3)                   | 0.773           |
| Acute kidney injury, n (%)        | 790 (0.1)                  | 4 (0.4)                       | 316 (0.1)                      | 0.012           | 470 (0.1)                     | 0.014           |
| Access-site complication, n (%)   | 11,311 (1.3)               | 35 (3.1)                      | 6,020 (1.8)                    | 0.002           | 5,256 (1.0)                   | <0.001          |
| Transfusion, n (%)                | 1,690 (0.2)                | 1 (0.1)                       | 1,165 (0.4)                    | 0.211           | 524 (0.1)                     | 1.000           |
| Access-site haemorrhage, n (%)    | 2,205 (0.3)                | 5 (0.4)                       | 1,818 (0.6)                    | 0.465           | 382 (0.1)                     | 0.004           |
| In-hospital major bleeding, n (%) | 4,926 (0.6)                | 10 (0.9)                      | 3,284 (1.0)                    | 0.855           | 1,632 (0.3)                   | 0.001           |
| In-hospital mortality, n (%)      | 13,036 (1.5)               | 50 (4.4)                      | 7,577 (2.3)                    | <0.001          | 5,409 (1.0)                   | <0.001          |
| Periprocedural CVA, n (%)         | 970 (0.1)                  | 6 (0.5)                       | 444 (0.1)                      | <0.001          | 524 (0.1)                     | <0.001          |
| Periprocedural MI, n (%)          | 2,537 (0.3)                | 3 (0.3)                       | 1,280 (0.4)                    | 0.803           | 1,254 (0.2)                   | 0.724           |
| In-hospital MACCE, n (%)          | 16,305 (1.9)               | 58 (5.1)                      | 9,134 (2.8)                    | <0.001          | 7,113 (1.3)                   | <0.001          |
| Length of stay (days), ±SD        | 2.7±8.0                    | 3.7±14.8                      | 3.0±8.7                        | 0.032           | 2.5±7.3                       | <0.001          |

\* p-value brachial vs femoral. † p-value brachial vs radial.

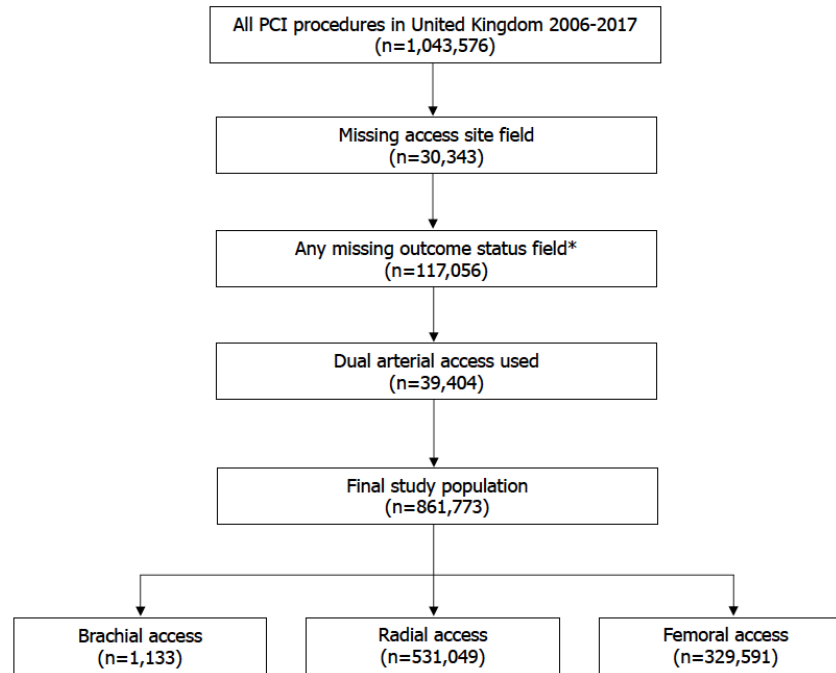

**Supplementary Figure 1.** Patient number flow for study.

\*Fields included were MACCE, mortality, arterial complication and major bleeding.



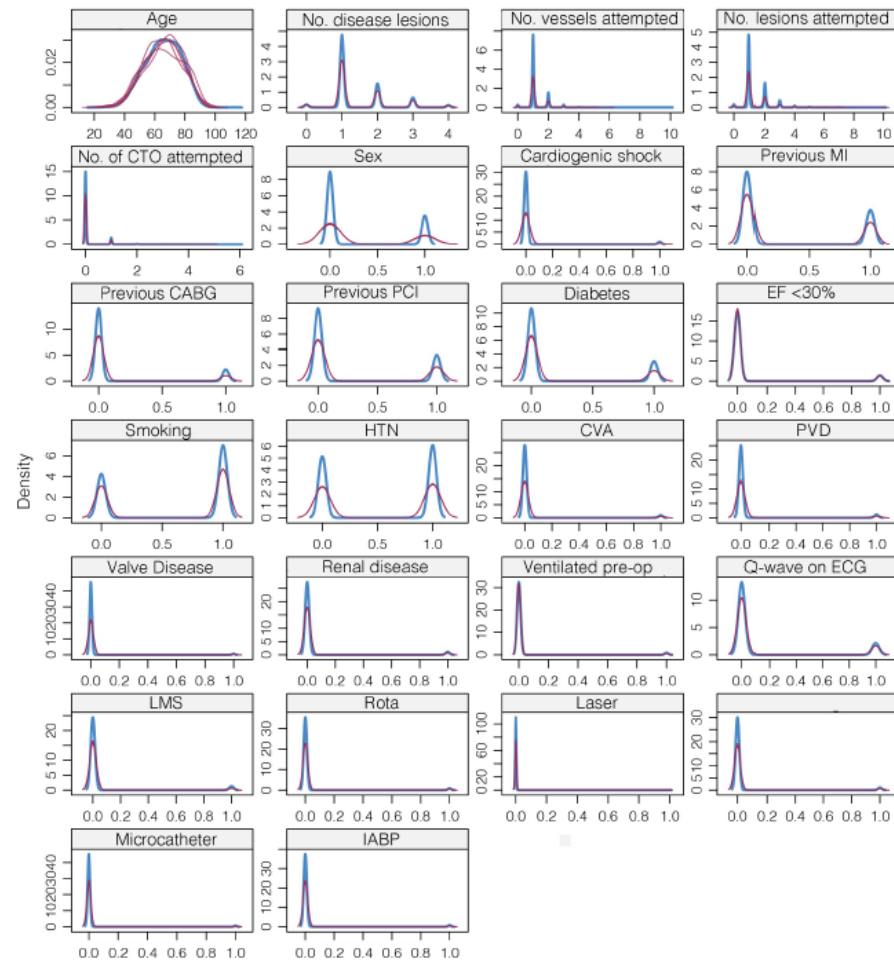

**Supplementary Figure 2.** Density plot.

Density plot of all imputed variables demonstrating that the imputed data set distribution (red curves; one from each of the five imputed data sets) is similar to the observed data set distribution (blue curves) indicating that the multiple imputation with chained equations (mice) process has successfully imputed values that are “plausible”. X-axis indicates the range of values for each variable. Y-axis is the density distribution.

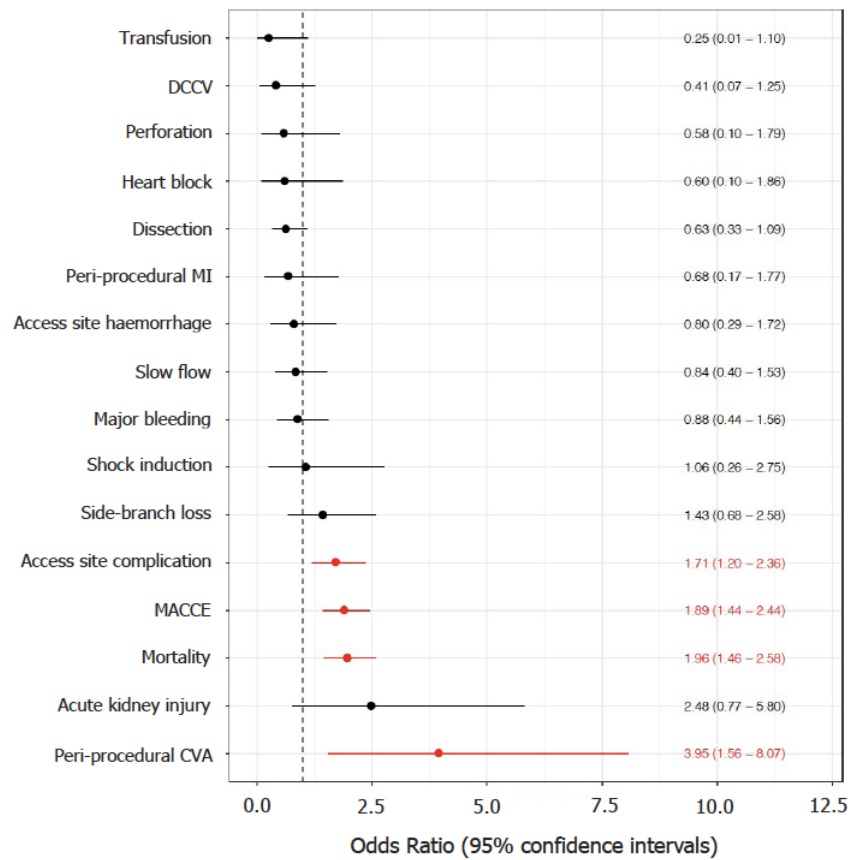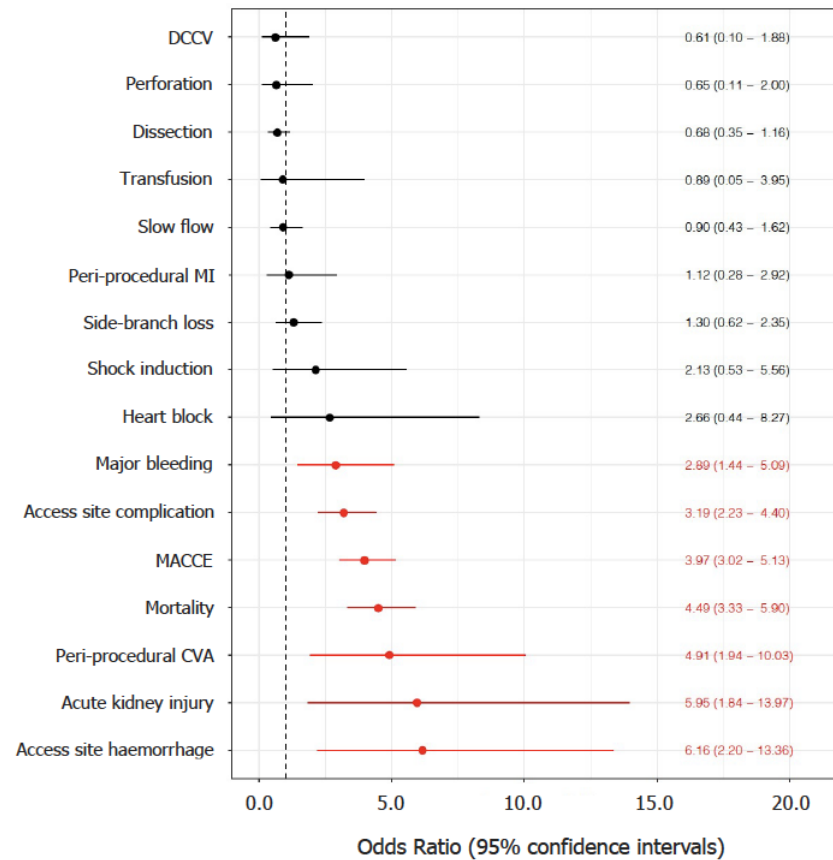

**Supplementary Figure 3.** Weight-adjusted procedural and clinical outcomes.

Left panel - IPTW weight-adjusted procedural and clinical outcomes of brachial access procedures compared to femoral access for PCI in the United Kingdom 2006-2017. Right panel - IPTW weight-adjusted procedural and clinical outcomes of brachial access procedures compared to radial access for PCI in the United Kingdom 2006-2017.

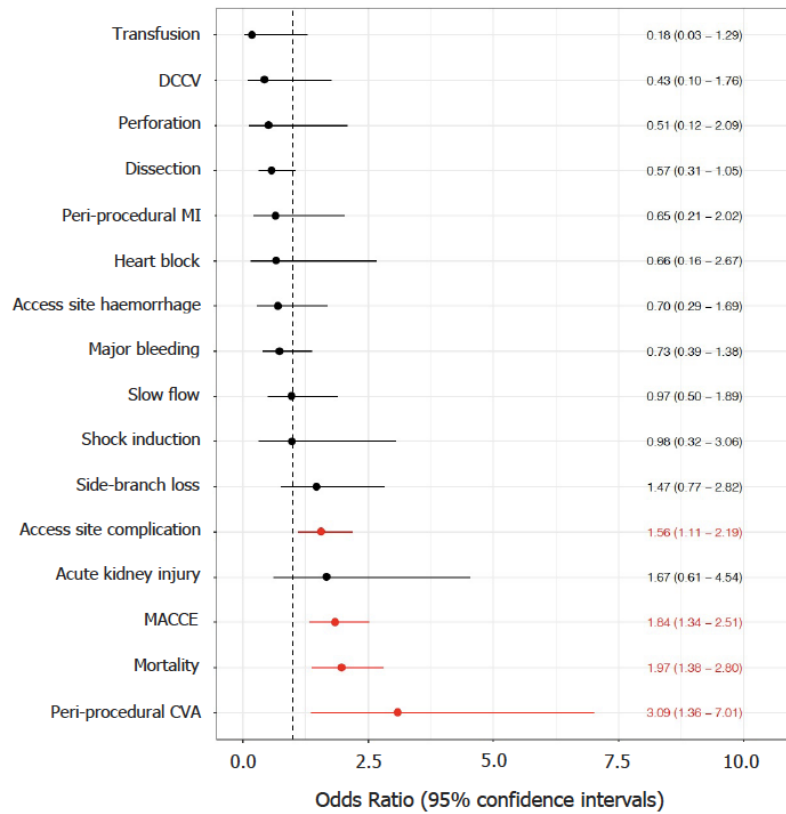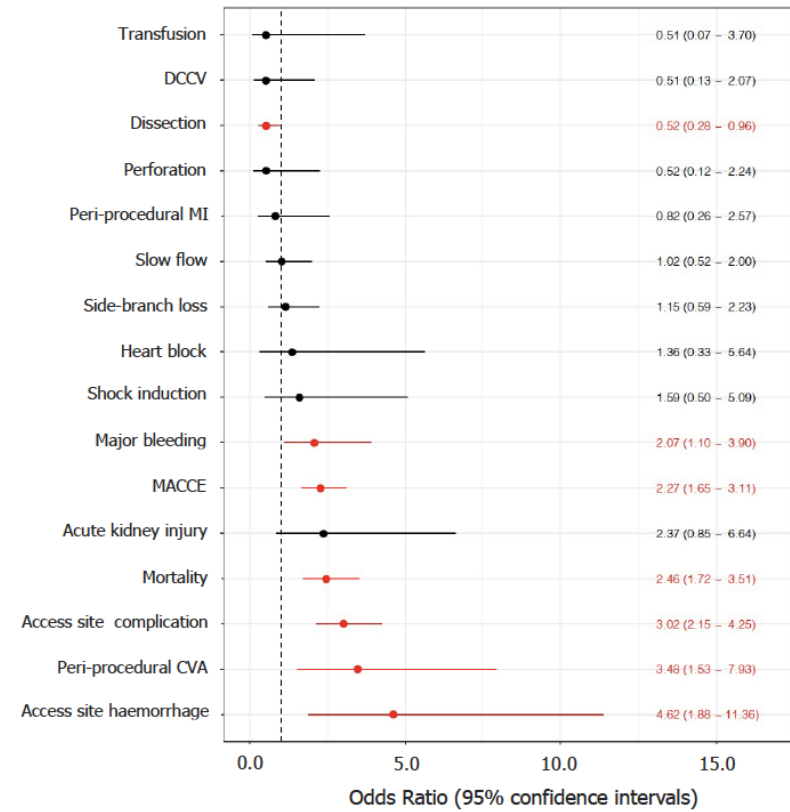

**Supplementary Figure 4.** Multivariate-adjusted procedural/clinical outcomes.

Left panel - Multivariate-adjusted procedural/clinical outcomes of brachial access procedures compared to femoral access for PCI in the UK 2006-2017. Right panel - Multivariate-adjusted procedural/clinical outcomes of brachial access procedures compared to radial access for PCI in the UK 2006-2017.

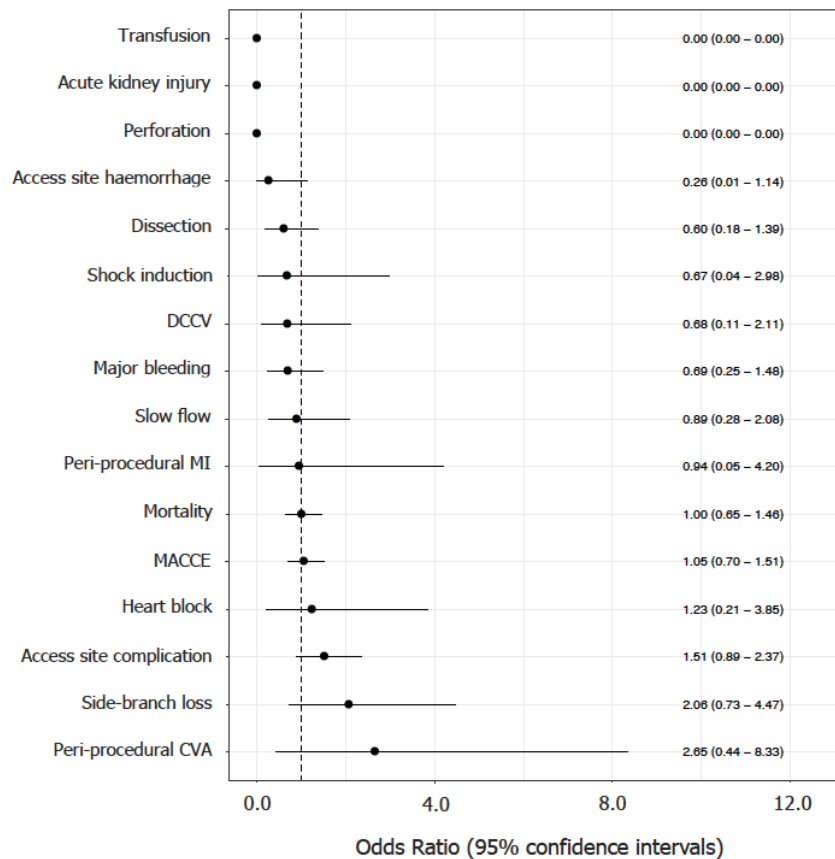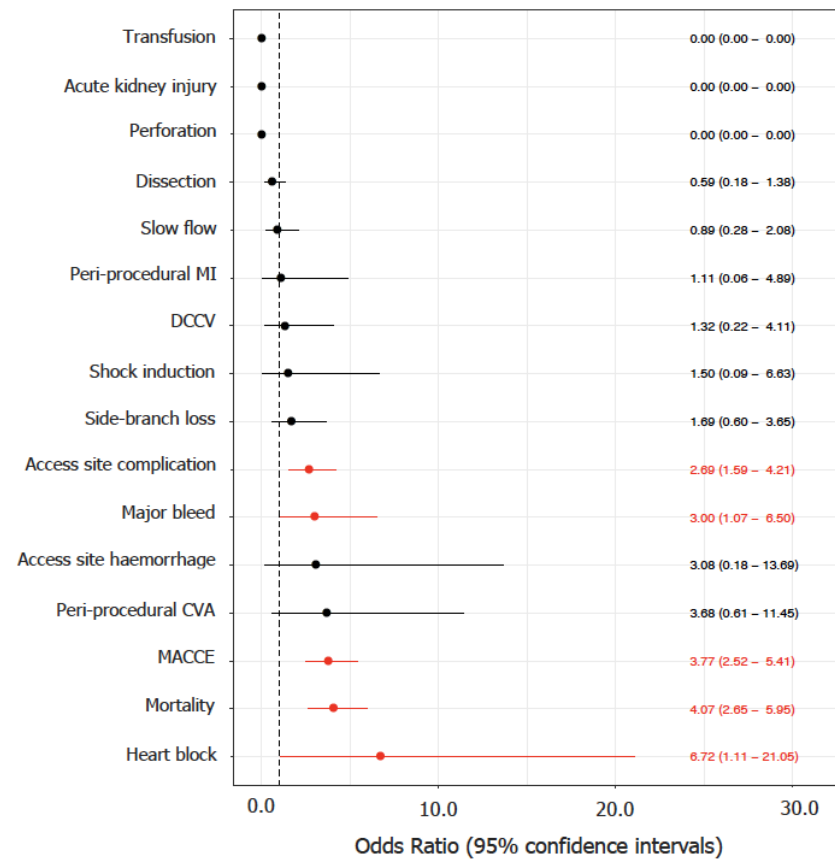

**Supplementary Figure 5.** IPTW weight-adjusted procedural and clinical outcomes.

Left panel - IPTW weight-adjusted procedural and clinical outcomes of brachial access procedures compared to femoral access for PCI in the United Kingdom 2013-2017. Right panel - IPTW weight-adjusted procedural and clinical outcomes of brachial access procedures compared to radial access for PCI in the United Kingdom 2013-2017. IPTW: inverse probability of treatment weighting
